# Supplementary material for: Neglecting the neglected: Tobacco cessation support is essential for the management of asthma and COPD
Source: PubMed Central journal article supplement (PMC10804862; doi:10.18332/tid/176228), 2024-01-23
Supplement: TID-22-22-s1.pdf [file TID-22-22-s1.pdf]

### **Inhaler use of the sample**

Asthmatics mostly used a single inhaler device (57.7%), whereas COPD patients used multiple devices (62.6%). The use of ICS-containing regimens was 95.2% in asthmatics and 61.5% in COPD patients. Only metered-dose inhaler (MDI) users had a higher rate of asthma (16.9% vs 4.2%), and only dry powder inhaler (DPI) users had a higher rate of COPD (61.5%). Asthmatics were mostly using an inhaled corticosteroids and long-acting beta-2 agonist combination (ICS+LABA) regimen (88.3%), while COPD patients were mostly using triple combinations (43.2%).

### **Disease severity and stage of the patients**

Asthmatics were mostly moderate (55.9%), with mild and difficult-to-treat asthmatics accounting for 25.5% and 18.6%, respectively. According to the ACT, 28.3% of asthma cases were poorly controlled, 23.4% were not- well controlled, and 48.3% were well controlled.

In terms of COPD, 35.8% were in Category A, 29.7% were in Category B, and 34.4% were in Category E. Inhaler bronchodilator treatment regimens for COPD patients classified as GOLD is seen in Supplement table. LABA plus long-acting muscarinic antagonist (LAMA) regimes were most commonly used (43.1%) in category A patients, followed by triple combination with ICS (LABA+LAMA+ICS) (27.5%) and LABA plus ICS (19.6%). Most people in category B were on triple therapy (54%) or LABA plus ICS (18.1%). Nearly half of those in Category E were on triple therapy (LABA+LAMA+ICS) (49%) or LABA plus LAMA (11.3%) or LABA plus ICS (11.3%) (Supp Figure).

### **Captures of figures:**

**Figure 1.** Distribution of COPD patients according to treatment choices and the categories  
*Abbreviations: SABD: Short-acting bronchodilator, LABA: Long acting beta-2 agonist, LAMA: Long-acting muscarinic antagonist, ICS: Inhaled corticosteroid*

**Figure 2.** Among current smokers number of patients regarding the use of quit services at first month follow-ups by phone call.

**Supplement table.** Comparison of clinical and medication use characteristics of asthma and COPD patients.

|                                                      | <b>Asthma<br/>(n:145)</b> | <b>COPD<br/>(n:148)</b> | <b>p</b> |
|------------------------------------------------------|---------------------------|-------------------------|----------|
| <b>Age at diagnosis, median (IQR)</b>                | 44.6 (14.4)               | 56.8 (10.2)             | <0.001   |
| <b>Diagnosis duration, median (IQR)</b>              | 7.00(11.5)                | 5.00 (8.0)              | 0.052    |
| <b>Inhaler users</b>                                 | 142 (97.9%)               | 142 (95.9%)             | 0.325    |
| <b>Inhaler device number</b>                         |                           |                         | 0.001    |
| <b>Single inhaler users</b>                          | 82 (57.7%)                | 54 (37.8%)              |          |
| <b>Multiple inhaler users</b>                        | 60 (42.3%)                | 89 (62.2%)              |          |
| <b>Inhaler device number, (median, IQR)</b>          | 2.00 (1.00)               | 2.00 (1.00)             | <0.001   |
| <b>ICS users</b>                                     |                           |                         | <0.001   |
| <b>Present</b>                                       | 138 (95.2%)               | 91 (61.5%)              |          |
| <b>Absent</b>                                        | 7 (4.8%)                  | 57 (38.5%)              |          |
| <b>Only short acting users</b>                       |                           |                         | 0.541    |
| <b>Yes</b>                                           | 4 (2.8%)                  | 6 (4.1%)                |          |
| <b>No</b>                                            | 141 (97.2%)               | 142 (95.9%)             |          |
| <b>Inhaler types</b>                                 |                           |                         | 0.003    |
| <b>All/Only nebuliser users</b>                      | 2 (1.3%)                  | 3 (2.0%)                |          |
| <b>Only Dry powder users</b>                         | 67 (47.2%)                | 88 (61.5%)              |          |
| <b>Only MDI users</b>                                | 24 (16.9%)                | 6 (4.2%)                |          |
| <b>DPI+MDI users</b>                                 | 49 (34.5%)                | 46 (32.2%)              |          |
| <b>Montelukast users</b>                             | 78 (53.8%)                | 6 (4.1%)                | <0.001   |
| <b>Theophylline users</b>                            | 2 (1.4%)                  | 7 (4.7%)                | 0.097    |
| <b>Long acting group</b>                             |                           |                         | <0.001   |
| <b>None</b>                                          | 7 (4.8%)                  | 10 (6.8%)               |          |
| <b>ICS only</b>                                      | 2 (1.4%)                  | 3(2.0%)                 |          |
| <b>LAMA only</b>                                     | 0                         | 14 (9.5%)               |          |
| <b>LABA+LAMA</b>                                     | 1 (0.7%)                  | 33 (22.3%)              |          |
| <b>LABA+ICS</b>                                      | 128 (88.3%)               | 24 (16.2%)              |          |
| <b>LABA+LAMA+ICS</b>                                 | 7 (4.8%)                  | 64 (43.2%)              |          |
| <b>Presence of family history for airway disease</b> | 71 (49.3%)                | 30 (20.3%)              | <0.001   |
| <b>Mild-moderate exacerbations</b>                   |                           |                         | <0.001   |
| <b>0-1</b>                                           | 127 (87.6%)               | 101 (68.2%)             |          |
| <b>≥2</b>                                            | 18 (12.4%)                | 47 (31.8%)              |          |
| <b>Hospitalization requiring exacerbation</b>        |                           |                         | <0.001   |
| <b>0</b>                                             | 139 (95.9%)               | 118 (79.7%)             |          |
| <b>≥1</b>                                            | 6 (4.1%)                  | 30 (20.3%)              |          |
| <b>GOLD</b>                                          |                           |                         |          |
| <b>A</b>                                             | -                         | 53 (35.8%)              |          |
| <b>B</b>                                             | -                         | 44 (29.7%)              |          |
| <b>E</b>                                             | -                         | 51 (34.4%)              |          |
| <b>Asthma severity</b>                               |                           |                         |          |
| <b>Mild</b>                                          | 37 (25.5%)                | -                       |          |
| <b>Moderate</b>                                      | 81 (55.9%)                | -                       |          |
| <b>Difficult to treat</b>                            | 27 (18.6%)                | -                       |          |

|                                            |            |   |  |
|--------------------------------------------|------------|---|--|
| <b>Asthma control test score (mean,SD)</b> | 18,2(5.11) | - |  |
| <b>Very poorly controlled (5-15)</b>       | 41 (28.3%) | - |  |
| <b>Not-well controlled (16-19)</b>         | 34 (23.4%) | - |  |
| <b>Well-controlled (20-25)</b>             | 70 (48.3%) | - |  |

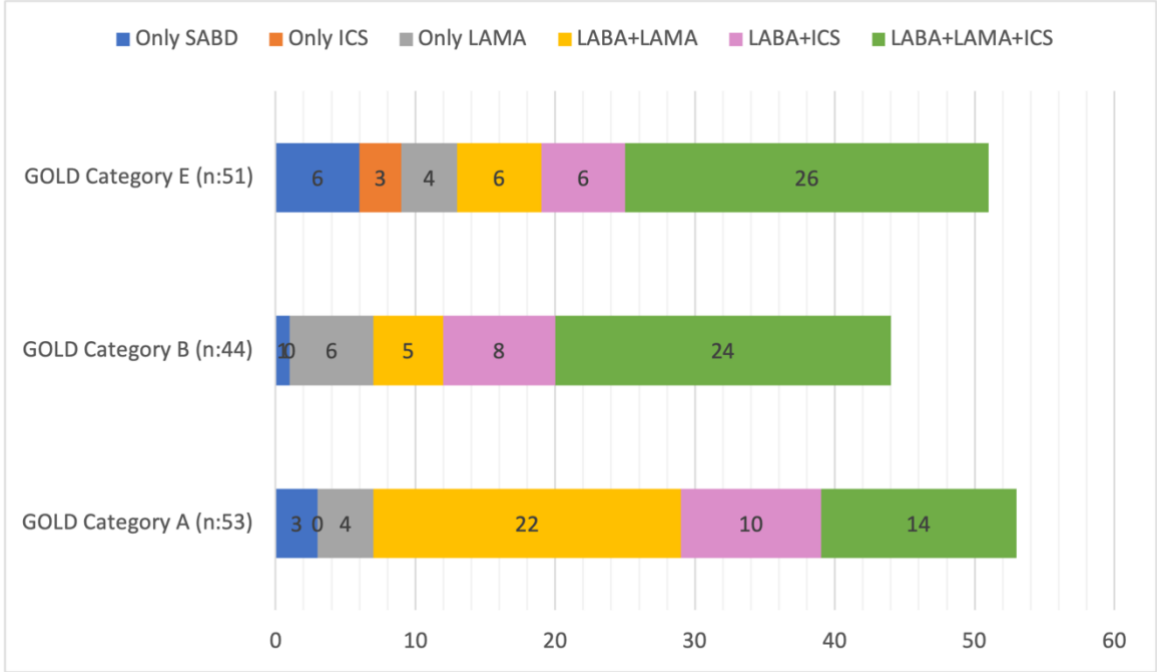

© 2024 Karadogan D. et al.
